# Supplementary material for: Dmy initiates masculinity by altering Gsdf/Sox9a2/Rspo1 expression in medaka (Oryzias latipes)
Source: PubMed Central journal article supplement (PMC4726206; doi:10.1038/srep19480), 2016-01-25

1 **Title: *Dmy* initiates masculinity by altering *Gsdf/Sox9a2/Rspo1***  
2 **expression in medaka (*Oryzias latipes*)**

3

4

5 **Tapas Chakraborty<sup>a, b, c, e, g</sup>, Lin Yan Zhou<sup>a, b, d</sup>, Aparna Chaudhari<sup>e</sup>, Taisen Iguchi<sup>f</sup>,**  
6 **Y. Nagahama<sup>a, b, g</sup>\***

7 <sup>a</sup> *Laboratory of Reproductive Biology, National Institute for Basic Biology, Okazaki 444-*  
8 *8585, Japan*

9 <sup>b</sup> *SORST, Japan Science Technology Corporation, Kawaguchi, Saitama 332-0012, Japan*

10 <sup>c</sup> *South Ehime Fisheries Research Center, Institution for Collaborative Relations, Ehime*  
11 *University, Nishiura, 798-4206, Japan*

12 <sup>d</sup> *Key Laboratory of Aquatic Science of Chongqing, School of Life Science, Southwest*  
13 *University, Chongqing, 400715, China*

14 <sup>e</sup> *Central Institute of Fisheries Education, Mumbai, 400061, India*

15 <sup>f</sup> *Laboratory of Molecular Environmental Endocrinology, Okazaki Institute for*  
16 *Integrative Bioscience, National Institute for Basic Biology, Okazaki 444-8787, Japan*

17 <sup>g</sup> *South Ehime Fisheries Research Center, Institution for Collaborative Relations, Ehime*  
18 *University, Matsuyama 790-8577, Japan*

19 **Short Title:** Molecular mechanism of *Dmy* associated sexuality in medaka

20

21 \* Corresponding author at: South Ehime Fisheries Research Center, Institution for  
22 Collaborative Relations, Ehime University, Matsuyama 790-8577, Japan.

23 Phone: (+ 81) 895 73 7112. *E-mail address:* [nagahama.yoshitaka.mh@ehime-u.ac.jp](mailto:nagahama.yoshitaka.mh@ehime-u.ac.jp)

24

25 **Key words:** *Dmy*; sex reversal; loss-of-function; F3 progeny; GSDF; Sox9; Masculinity;

26 Medaka

27

28 **Supporting Information:**

29

30 1. **Supplementary materials and methods**

31

32 2. **Supplementary Table 1: Summary of GFP knockdown using *olvas-eGFP***  
33 **transgenic medaka at F<sub>0</sub> generation.**

34

35 3. **Supplementary Table 2: Summary of shDNA dependent *Dmy* knockdown**  
36 **in QurtE medaka.**

37

38 4. **Supplementary Table 3: Summary of *Dmy* knockdown in medaka.**

39

40 5. **Supplementary table 4: Generation and evaluation of *Dmy*-AS founder**  
41 **transgenics**

42 6. **Supplementary Table 5: Egg production characteristics of *Dmy***  
43 **knockdown fish.**

44

45 7. **Supplementary Table 6: List of major primers used in this study.**

46

47 8. **Supplementary Figure 1: Construction of *Dmy* knockdown plasmid and *in***  
48 ***silico* analysis of efficacy.**

49

50 9. **Supplementary Figure 2: Possible mechanism of vector based AS DNA**  
51 **dependent AS RNA machinery *in vivo*.**

52

53 10. **Supplementary Figure 3: Effect of *Dmy* knockdown on gonadal gene**  
54 **profile in adults.**

55

56 11. **Supplementary figure 4. *In vivo* evaluation of knockdown efficiency of F<sub>2</sub>**  
57 **transgenics.**

58

59 12. **Supplementary figure 5. *In vivo* chromatin immunoprecipitation analysis**  
60 **of candidate *Dmy* targets.**

61

62 13. **Supplementary Figure 6: Effect of *Gsdf* and *Sox9a2* overexpression on**  
63 **germ cell proliferation and reversal of *Dmy*-KD phenotype.**

64

65 14. **Supplementary figure 7. Schematic diagram showing the breeding and**  
66 **mating strategies of *Dmy*-KD transgenic line.**

67

68

## 69 **Supplementary Materials and Methods**

70 **Plasmid constructs.** The AS (Antisense) RNA expression constructs were designed  
71 and evaluated using the online tool E-RNAi. Several constructs of different length (200-  
72 320bp) were selected, amplified, evaluated *in vitro* before starting the actual experiment.  
73 A selected primer pair carrying *Xba*I and *Eco*RV sites (Supplementary table 5) was used  
74 to amplify a 220-bp region of the *Dmy* gene (Supplementary Fig. 1) from a plasmid  
75 containing the complete *Dmy* ORF (a gift from Dr. M. Matsuda, Japan). A 359-bp  
76 sequence of the *Gfp* gene was also amplified from the plasmid pCMV-GFP (Dr.  
77 Krishnan, India) using specific primers with the same RE sites (Supplementary table 5).  
78 The amplicons were cloned under the control of the CMV early promoter in pCDNA3.1  
79 (+) (Invitrogen, USA) in the AS orientation. The constructs were transformed into *E. coli*  
80 (XL1 blue) and the positive clones were confirmed by sequencing. The sequences were  
81 also analysed for secondary structures *in silico* using *RNAfold* online software  
82 (<http://rna.tbi.univie.ac.at/cgi-bin/RNAfold>). The recombinant plasmids were designated  
83 as pmDMY-AS and pEGFP-AS. Plasmid DNA used for downstream experiments was  
84 purified using a plasmid purification kit (Qiagen, Germany). A schematic representation  
85 of the AS RNA expressing construct is given in supplementary Fig 1.

86 The complete *Dmy* ORF (820 bp) was cloned into the pCDNA 3.1 histopo T-vector  
87 using ORF-specific primers (Supplementary table 5). A clone that contained the insert in  
88 the right orientation was selected after sequencing. The recombinant plasmid was named  
89 pmCMV-DMY. Similarly, complete ORFs of *Wt1a/b*, *Ad4bp/Sf1*, *Sox9a2* and *Gsdf* were  
90 also amplified (from previous constructs in the pGEMTeasy vector), cloned into pCDNA  
91 3.1 histopo T-vector, sequenced to confirm the correct orientation and named as pCMV-  
92 *Wt1a/b*, pCMV-Sf1, pCMV-Sox9a2 and pCMV-Gsdf, respectively. A 300 bp *Dmy*  
93 promoter fragment was isolated using specific primer set and cloned in pGL3 basic vector  
94 (Promega, USA) using Infusion-cloning kit (Clontech, USA). Stop codon-less *Gsdf* and  
95 *Sox9a2* ORFs were inframe with Cherry (from pmCherryN1 vector) and cyan (from

96 pamCyanN1 vector) ORF, respectively, and cloned into a pCS2 vector (a gift from Dr.  
97 Ogino, NIBB, Japan) using Infusion cloning kit (Clontech, USA). All the genes used for  
98 real-time PCR and *in situ* analysis were cloned into pGEM T Easy vector.

99

100 **Gene knockdown in Cos7 cells.** Knockdown of *Dmy* expression by the pmDMY-AS  
101 construct was tested in Cos-7 cells with no endogenous expression of *Dmy*, *Dmrt1*,  
102 *Sox9a2*, *Ad4bp/Sfl* or *Gsdf*. Cos-7 cells were seeded in 24-well plates, at  $5 \times 10^5$   
103 cells/well, containing Dulbecco's modified Eagle's Medium (Sigma, USA) supplemented  
104 with 10% charcoal/ dextran treated foetal bovine serum (Hyclone, USA). The cells were  
105 incubated for 24 h at  $37^\circ\text{C}$  with 5%  $\text{CO}_2$  and co-transfected with 100 ng of pmCMV-  
106 DMY and 5/ 10/ 100 ng of the pmDMY-AS construct using Fugene-6 transfection  
107 reagent (Roche Diagnostics, Switzerland) following the manufacturer's instructions.  
108 Cells transfected with only pmCMV-DMY served as positive controls while the negative  
109 controls were treated with only the transfection reagent. The cells were grown for 96 h  
110 after which total RNA was isolated and target transcripts quantified by real-time PCR as  
111 detailed later. The transfections were performed in triplicate at one time point and then  
112 repeated twice later. In separate experiments, cells were also transfected with pCMV-  
113 DMRT1, pCMV-SOX9a2, pCMV-SF1 and pCMV-GSDF, and the effect of pmDMY-AS  
114 on their expression was also quantified by real-time PCR. The transcript copy numbers  
115 are shown as the mean  $\pm$  SEM and the dose-response data was computed using Statview  
116 v. 5 (SAS institute Inc, Cary NC).

117

118 **Experimental animals.** The QurtE strain of medaka was mostly used for this study.  
119 This strain expresses a male-specific leucophore that allows easy sexing of fish. Another  
120 strain called the *olvas-eGFP* transgenic medaka was also used. This strain carries the *Gfp*  
121 gene under *vasa* promoter and is reported to express GFP fluorescence in germ cells in  
122 both males and females<sup>1</sup>. All the fish were maintained at  $26 \pm 2^\circ\text{C}$  under a 14 h light and

123 10 h dark cycle. Eggs were collected within 30 min of fertilization and incubated in  
124 distilled water (milli-Q) containing antifungal solution (Methylene blue, 0.0001%) at 26  
125  $\pm 2^{\circ}\text{C}$ . Brooders and juveniles were fed with fresh artemia, while larvae were given  
126 artificial feed. Classification of developmental stages was done according to the  
127 descriptions of Iwamatsu<sup>2</sup>. All *in vivo* experiments were conducted following protocols  
128 and procedures approved by Institutional Animal Care and Use Committee at the  
129 National Institute for Basic Biology, Japan.

130

131 **Knockdown of *Dmy* expression in medaka embryos.** One-two cell embryos of the  
132 QurtE strain of medaka were electroporated with the pmDMY-AS plasmid construct (1  
133  $\mu\text{g/ml}$ ) in 1X HBS buffer, pH 7.5<sup>3</sup>. Electroporation was carried out in a Cuy21 edit type  
134 electroporator (Bex, Tokyo) at 24V, with 9 millisecond (ms) pulse, 900 ms pause for 3  
135 times. Embryos electroporated with-HEPES buffered saline (HBS) alone and those  
136 electroporated with pCMV-GFP constructs served as controls. peGFP-AS plasmids were  
137 electroporated into one-two cell embryos of *olvas-eGFP* transgenic medaka to evaluate  
138 the knockdown of GFP expression.

139

140 **Sampling.** Electroporated male embryos of the QurtE strain of medaka were  
141 randomly sampled at 5 days after fertilization (daf) and 0, 5, 10, 20, 50 and 90 days after  
142 hatching (dah) in order to check the gonadal morphological changes and further  
143 confirming the gene knockdown effects at both genetic and phenotypic levels. Minimum  
144 of 10 fish were sampled at each time point. The genetic sexes of all fish were confirmed  
145 by *Dmy*-genomic PCR<sup>4</sup>. Electroporated *olvas-eGFP* transgenic medaka were periodically  
146 observed for any fluorescence reduction and morphological defect until hatching, and all  
147 the fish of 10 dah were culled and fixed for histological examination of the gonads. All  
148 fish were also sexed accordingly<sup>4</sup>. 10 adults of control XY and DmyKD-XY (Dmy-AS  
149 (+)) groups were dissected and different tissues were separately collected to prepare the

150 tissue distribution samples. The early stage samples (from Stage 20 to 39) were initially  
151 separated based on leucophore expression and later the individuals were separately  
152 screened using *Dmy* genomic PCR. The *Dmy* positive and negative samples (10  
153 individual each) of the same stage were separately pooled together. Other earlier stage  
154 RNA samples (from Stage 4 to 19) were collected from monogametic populations of XX  
155 and XY. Three different pools of samples were prepared for reproducible results.

156

157 **Histology and *in situ* hybridisation.** Whole fish samples at 0, 5, 10 and 50 dah and  
158 gonads of adults were fixed in Bouin' fixative, embedded in paraffin, sectioned at 5 µm  
159 and subjected to standard haematoxylin-eosin (HE) staining. Paraformaldehyde (4%)  
160 fixed, paraffin embedded samples (10 dah and adult) were used for *in situ* hybridisation.  
161 Hybridisation was done using sense and anti-sense digoxigenin-labelled RNA probes  
162 transcribed *in vitro* with a RNA labelling kit (Roche, Germany) from their respective  
163 plasmids. Briefly, the sections were deparaffinised, hydrated and treated with proteinase  
164 K (10 µg/ml, Roche) and then hybridised with sense or anti-sense DIG-labelled RNA  
165 probes at 58 °C for 22 h. Hybridisation signals were then detected using alkaline  
166 phosphatase-conjugated anti-DIG antibody (Roche) and NBT as described previously<sup>5</sup>.  
167 Whole mount *in situ* hybridisation was carried out using previously published protocols<sup>6</sup>.

168

169 **Quantification of changes in gene expression by real-time PCR.** Changes in gene  
170 expression were quantified using the ABI Prism 7000 sequence detection system  
171 (Applied Biosystems, USA). Total RNA was isolated from cells, embryos, and gonads,  
172 using RNeasy Mini kit (Qiagen, Germany). cDNA synthesis was carried out using  
173 Quantitect RT PCR kit (Qiagen) from 100 ng of total RNA. The first strand cDNAs were  
174 diluted to 100 µl for subsequent use. Gene-specific RT-PCR was performed using SYBR  
175 green master mix (Applied Biosystem, USA) and 5 ng of cDNA, according to the  
176 manufacturer's instructions. The real-time PCR primers are listed in Supplementary table

177 5. The PCR conditions included an initial denaturation at 94 °C (2 min) followed by 40  
178 cycles at 94 °C (30 s) and 60 °C (1 min). *Eflα* or *Rps18* was used as the internal control.  
179 The absolute transcript copy number of each gene was determined with the help of  
180 appropriate standard curves and normalized with the *Eflα/ Rps18* copy numbers in each  
181 sample. The reported values are average of sample triplicates.

182

183 **Assessment of the trans-generational knockdown effect.** The QurtE embryos  
184 injected with pmDMY-AS were grown to adulthood. Based on secondary sexual  
185 characters and the presence of leucophores, genetic males that sex reversed to females  
186 were identified and mated with normal males to assess their breeding behaviour and  
187 mating performance. Successfully mated XY females were used for the production of F<sub>1</sub>  
188 progeny (Supplementary figure 7). Caudal fin clips from XY females of the F<sub>0</sub> and F<sub>1</sub>  
189 generations were used for genomic DNA isolation<sup>4</sup>. The genome integration of the  
190 pmDMY-AS construct was tested using a primer pair that amplified a portion of the  
191 vector and *Dmy* AS sequence (Supplementary table 5) and then confirmed by sequencing.  
192 Aliquots of the same genomic DNA samples were analysed by real-time PCR to estimate  
193 the number of integrated copies. The breeding experiment was similarly performed with  
194 F<sub>1</sub> and F<sub>2</sub> fish, and the offsprings were histologically examined at 10 and 20 dah.

195

196 **Characterisation of small RNAs.** To determine the AS plasmid associated  
197 mechanism of RNA suppression *in vivo*, total RNA (enriched with small RNA) was  
198 isolated from the adult gonads of F<sub>1</sub> progeny, using the miRNeasy mini kit (Qiagen),  
199 following the manufacturer's protocol. Small RNAs were separated using 15%  
200 denaturing polyacrylamide gel electrophoresis. A Northern blot analysis was performed  
201 using a digoxigenin-labelled AS *Dmy* probe following the standard protocol. In a separate  
202 experiment, RNA bands ranging from 18-28 nucleotides as well as 60-70 nucleotides  
203 were excised from gels, and purified using RNA extraction buffer of the DynaExpress

204 miRNA cloning kit (Bio Dynamics, Japan). 5` and 3` linkers were added to the purified  
205 small RNA and cDNA was produced, according to the manufacturer's instructions. The  
206 cDNAs were PCR amplified and cloned into the pGEMTeasy vector (Promega, Japan).  
207 Both colony PCR and dot blots (using dig-labelled AS *Dmy* probes) were performed to  
208 screen the inserts and the positive clones were sequenced.

209

210 **Promoter analysis.** The promoter analysis was performed using a previously  
211 described protocol<sup>7</sup>. Briefly, HEK293 cells were seeded in 24-well plates, at  $5 \times 10^5$   
212 cells/well, containing Dulbecco's modified Eagle's Medium (Sigma, USA). After 24  
213 hours, the cells were transfected with pGL3-DMY-luciferase plasmid and either one of  
214 pcDNA3.1-WT1a/b (both +/-KTS) plasmids, at different concentration (0-200 ng/well) in  
215 triplicates. The luciferase assay was performed after 48 hours of transfection. The  
216 experiment was repeated thrice for reproducibility. The O132 cells were similarly  
217 prepared in L-15 medium (Sigma, USA) and co-transfected with pGL3-Gsdf or pGL3-  
218 Sox9a2 and pcDNA3.1-Dmy to assess the *Dmy* associated *Gsdf* and *Sox9a2* promoter  
219 activity.

220

221 ***In vivo* Chromatin Immunoprecipitation analysis of *Dmy*.** Binding sites for *Dmy*  
222 were identified using the matrix as provided<sup>8</sup>, together with the Regulatory Sequence  
223 Analysis Tools portal: RSat (<http://rsat.ulb.ac.be/rsat/>, last accessed February 15, 2015),  
224 weight score  $\geq 1$ , p-value  $\leq 1$ . For *in vivo* chromatin immunoprecipitation (ChIP), the  
225 ChIP expression-shearing kit (Active motif) was used according to the manufacturer's  
226 instructions, using 20 mg of embryonic tissue samples from *Dmy-Gfp* mRNA injected  
227 fish (50 embryos for each) and GFP monoclonal antibody (3 mg, AbCAM). The *Dmy*-  
228 *Gfp* plasmid was constructed by sequentially fusing *Dmy*-5`UTR, *Dmy*-ORF (stop codon  
229 less), *eGFP*, and *Dmy*- 3`UTR into a pCS2 vector using infusing cloning kit (Clontech)  
230 and RNA was synthesized with mMESSAGE mMECHINE SP6 kit (Ambion, USA)



231 following polyA addition with Poly-A tailing kit (Ambion) After tissue disaggregation  
232 and cell re-suspension, DNA was sheared according to the manufacturer's protocols. The  
233 ChIP procedure using *Dmy-Gfp* mRNA embryos was validated as described earlier<sup>8</sup>.

234

235 **Rescue of *Dmy* knockdown effects.** pmDMY-KD XY adult females (F<sub>3</sub> generation)  
236 were mated with *olvas-eGFP* XY males. The resulted progenies were screened for  
237 integration, grown to maturity and backcrossed with *olvas-eGFP* XY fish for 3  
238 consecutive generations and *olvas-eGFP-Dmy*-KD transgenic line was created. The F<sub>3</sub>  
239 generation fish developed from this line were used for rescue analysis. Briefly, the *Gsdf*-  
240 mcherry and *Sox9a2*-cyan mRNA, flanked by 5' and 3' untranslated regions of respective  
241 genes, were synthesized with mMESSAGE mMECHINE SP6 kit (Ambion, USA)  
242 following polyA addition with Poly-A tailing kit (Ambion). Control RNAs (only mcherry  
243 and cyan, flanked by both 5' and 3' UTRs of *Gsdf* and *Sox9a2*, respectively) were  
244 similarly prepared. The purified RNA was injected in one-two cell stage embryos of  
245 *Dmy*-KD fish @ 1ng/ul. Both reporter gene expression (mcherry and cyan, whatever  
246 applicable) and gonad development were monitored using Axioplan2 imaging (Zeiss,  
247 USA) confocal microscope for each embryo separately. The embryos showing reporter  
248 gene expression were then grown separately until 10 dah in a 24 well dish @ 1  
249 embryo/well and either fixed/ preserved for histological/ real-time PCR analysis or grown  
250 further to assess morphological sex change. Few of the manipulated fish caudal fin bud  
251 clips were used for genomic integration and genomic sex determination. Only the XY  
252 embryos having *Dmy*-KD insert (confirmed by integration PCR) were included in the  
253 analysis.

254

255 **Data analysis.** Statistical differences in relative mRNA expression between  
256 experimental groups were assessed by One Way ANOVA, followed by Tukey's test. All  
257 statistical analyses were performed using SPSS, version 18 software. All experimental

258 data are shown as the mean  $\pm$  SEM. Differences were considered statistically significant  
259 at  $p < 0.05$ , if not otherwise mentioned. Specially used data analysis methods are described  
260 in the respective sections.

261

262

263

## 264 **References**

265

- 266 1. Tanaka, M. Kinoshita, M. Kobayashi, D. & Nagahama, Y. Establishment of medaka  
267 (*Oryzias latipes*) transgenic lines with the expression of green fluorescent protein  
268 fluorescence exclusively in germ cells: a useful model to monitor germ cells in a live  
269 vertebrate. *Proc. Natl. Acad. Sci. USA*, **98**(5), 2544-9 (2001).
- 270 2. Iwamatsu, T. Stages of normal development in the medaka *Oryzias latipes*. *Mech.*  
271 *Dev*, **121**(7-8), 605-18 (2004).
- 272 3. Hostetler, H. A. Peck, S. L. Muir, W. M. High efficiency production of germ line  
273 transgenic Japanese medaka (*Oryzias latipes*) by electroporation with direct current-  
274 shifted radio frequency pulses. *Transgenic Res*, **12**(4), 413-24 (2003).
- 275 4. Matsuda, M. *et al.* DMY is a Y-specific DM-domain gene required for male  
276 development in the medaka fish. *Nature*, **417**(6888), 559-63 (2002).
- 277 5. Chakraborty, T. *et al.* Estrogen receptors in medaka (*Oryzias latipes*) and estrogenic  
278 environmental contaminants: an *in vitro*–*in vivo* correlation. *J. Steroid Biochem. Mol.*  
279 *Biol*, **123**(3-5), 115-21 (2011).
- 280 6. Inohaya, K. *et al.* Temporal and spatial patterns of gene expression for the hatching  
281 enzyme in teleost embryo *Oryzias latipes*. *Dev. Biol*, **171**, 374-85 (1995).
- 282 7. Wang, D. S. *et al.* Foxl2 up-regulates aromatase gene transcription in a female-  
283 specific manner by binding to the promoter as well as interacting with Ad4 binding  
284 protein/steroidogenic factor 1. *Mol. Endocrinol*, **21**(3), 712-25 (2007).
- 285 8. Herpin, A. *et al.* Divergent expression regulation of gonad development genes in  
286 medaka shows incomplete conservation of the downstream regulatory network of  
287 vertebrate sex determination. *Mol. Biol. Evol.* **30**(10), 2328–2346 (2013).

288

289  
290  
291  
292  
293  
294

**Supplementary tables:**

**Supplementary table 1: Summary of GFP knockdown using *olvas-eGFP* transgenic medaka at F<sub>0</sub> generation.**

| Stage and type of sampling | Analysis method                                       | Number of fish sampled | Number of fish changed |
|----------------------------|-------------------------------------------------------|------------------------|------------------------|
| 0 dah                      | Microscopic GFP fluorescence observation <sup>1</sup> | 10                     | 6                      |
| 10 dah                     | Real-time PCR <sup>2</sup>                            | 10                     | 10                     |
|                            | Microscopic GFP fluorescence observation <sup>1</sup> | 10                     | 7                      |
| Adult (4 months)           | Secondary sexual character <sup>3</sup>               | 20                     | 0                      |

295  
296  
297  
298  
299  
300  
301  
302

Note: Numbers in superscript indicate the biological end points analysed using the samples. 1. Change in *olvas-eGFP* expression pattern; 2. Change in germ cell number and occurrence of meiosis/ meiotic arrest; 3. Occurrence of fan like anal fin and forked dorsal fin in XX, and tapering anal fin and fused dorsal fin in XY fish.

303  
304  
305

**Supplementary table 2: Summary of shDNA dependent *Dmy* knockdown in QurtE medaka.**

| Sampling group              | Analysis method   | Number of fish sampled | Mitotic cell number $\pm$ SE | Meiotic cell number $\pm$ SE | Number of fish changed          | % change |
|-----------------------------|-------------------|------------------------|------------------------------|------------------------------|---------------------------------|----------|
| <b>pmCMV-DMYsh1</b>         | QPCR <sup>1</sup> | 10                     |                              |                              | 10                              | 100      |
|                             | HE <sup>2</sup>   | 10                     | 101 $\pm$ 27.6               | 0                            | 2 <sup>3</sup>                  | 20       |
| <b>pmCMV-DMYsh2</b>         | QPCR <sup>1</sup> | 10                     |                              |                              | 9                               | 90       |
|                             | HE <sup>2</sup>   | 10                     | 104 $\pm$ 14.4               | 0                            | 4 <sup>3</sup>                  | 40       |
| <b>pmCMV-DMYsh3</b>         | QPCR <sup>1</sup> | 10                     |                              |                              | 10                              | 100      |
|                             | HE <sup>2</sup>   | 10                     | 119 $\pm$ 11.8               | 1 $\pm$ 0.8                  | 2 <sup>3</sup> , 1 <sup>4</sup> | 20       |
| <b>pmCMV-DMYsh1 +sh2</b>    | QPCR <sup>1</sup> | 10                     |                              |                              | 8                               | 80       |
|                             | HE <sup>2</sup>   | 10                     | 210 $\pm$ 31.7               | 3 $\pm$ 2.9                  | 5 <sup>3</sup>                  | 50       |
| <b>pmCMV-DMYsh1 +sh3</b>    | QPCR <sup>1</sup> | 10                     |                              |                              | 10                              | 100      |
|                             | HE <sup>2</sup>   | 10                     | 230 $\pm$ 42.1               | 6 $\pm$ 4.2                  | 5 <sup>3</sup> , 3 <sup>4</sup> | 50       |
| <b>pmCMV-DMYsh1+sh2+sh3</b> | QPCR <sup>1</sup> | 10                     |                              |                              | 10                              | 100      |
|                             | HE <sup>2</sup>   | 10                     | 390 $\pm$ 21.2               | 19 $\pm$ 9.2                 | 8 <sup>3</sup> , 6 <sup>4</sup> | 80       |

306  
307  
308  
309

Note: Numbers in superscript indicate the biological end points analyzed using the samples. 1. Change in gene expression; 2. Change in germ cell number and occurrence of meiosis/ meiotic arrest; 3. Mitotic germ cell population; 4. Meiotic germ cell population.

310  
311

**Supplementary table 3: Summary of *Dmy* knockdown in medaka.**

| Stage of Sampling                           | Analysis method                                                       | Number of sample (N) | Number of fish with abnormal characters |
|---------------------------------------------|-----------------------------------------------------------------------|----------------------|-----------------------------------------|
| <b>F<sub>0</sub> generation</b>             |                                                                       |                      |                                         |
| <b>0 dah</b>                                | Real-time PCR <sup>1</sup>                                            | 10                   | 8                                       |
|                                             | Histology <sup>2</sup>                                                | 30                   | 7                                       |
| <b>10 dah</b>                               | Real-time PCR <sup>1</sup>                                            | 10                   | 10                                      |
|                                             | Histology <sup>2</sup>                                                | 10                   | 9                                       |
|                                             | <i>ISH</i> <sup>3</sup>                                               | 10                   | 6                                       |
| <b>50 dah</b>                               | Histology <sup>2</sup>                                                | 10                   | 2*, 5 <sup>#</sup>                      |
| <b>Adult</b>                                | Secondary sexual character <sup>4</sup>                               | 10                   | 7                                       |
|                                             | Breeding behaviour <sup>5</sup>                                       | 5                    | 5                                       |
|                                             | Gene integration <sup>6</sup>                                         | 5                    | 2                                       |
| <b>F<sub>1</sub> generation<sup>s</sup></b> |                                                                       |                      |                                         |
| <b>10 dah</b>                               | Histology <sup>2</sup>                                                | 361                  | 60                                      |
|                                             | <i>ISH</i> <sup>3</sup>                                               | 10                   | 3                                       |
| <b>Adult</b>                                | Secondary Sexual Characters <sup>4</sup>                              | 50                   | 15                                      |
|                                             | Genome integration <sup>6</sup>                                       | 12                   | 3                                       |
|                                             | Breeding behaviour <sup>5</sup>                                       | 3                    | 3                                       |
| <b>F<sub>2</sub> generation</b>             |                                                                       |                      |                                         |
| <b>10 dah</b>                               | Histology <sup>2</sup>                                                | 10                   | 3                                       |
|                                             | <i>ISH</i> <sup>3</sup>                                               | 10                   | 4                                       |
| <b>Adult</b>                                | Secondary sexual character <sup>4</sup>                               | 30                   | 12                                      |
|                                             | Breeding behaviour <sup>5</sup>                                       | 12                   | 4                                       |
| <b>F<sub>3</sub> generation</b>             |                                                                       |                      |                                         |
| <b>2 daf</b>                                | Histology <sup>2,7</sup>                                              | 10                   | 4                                       |
| <b>0 dah</b>                                | Rescue with <i>Sox9a2</i> <sup>2,8</sup>                              | 20                   | 0                                       |
|                                             | Rescue with <i>Gsdf</i> <sup>2,8</sup>                                | 20                   | 0                                       |
|                                             | Rescue with <i>Sox9a2</i> and <i>Gsdf</i> coexpression <sup>2,8</sup> | 10                   | 10                                      |
| <b>Adult</b>                                | Secondary sexual character <sup>4</sup>                               | 42                   | 41                                      |
|                                             | Breeding behaviour <sup>5</sup>                                       | 5                    | 5                                       |

312  
313  
314  
315  
316  
317  
318

Note: Numbers in superscript indicate the biological end points analysed using the samples. 1. Change in gene expression; 2. Change in gonadal structure, germ cell number and occurrence of meiosis/ meiotic arrest; 3. Changes in cellular localisation of different gene; 4. Occurrence of tapering anal fin and fused dorsal fin; 5. Mating Characteristics i.e. chasing, dancing, coiling, and pressing; 6. Positive PCR amplification of AS probe using a vector and gene specific primer pair; 7. Differences in *Wtl* expression; 8. Gonadal structure at 50dah; ‘\*’ Partial sex change and occurrence of testis ova; ‘#’ Complete sex change

319 and occurrence of complete ovary; 'S' combined profiles of two founder. The breeding behaviour and gene  
320 integration checks were performed with XY female fish (depending on secondary sexual characters).  
321

322 **Supplementary table 4: Generation and evaluation of Dmy-AS founder transgenics**  
 323

| Crossing method:                                            | Control XY ♂ | X Dmy-KD-XY ♀ |
|-------------------------------------------------------------|--------------|---------------|
| Characters                                                  | Founder 1    | Founder 2     |
| Number of eggs laid in first three week from 5 month of age | 211          | 187           |
| Hatched embryos after 7 days of fertilization               | 189          | 172           |
| Dmy-AS(-) XX ♀ embryo at 10 dah*                            | 53           | 45            |
| Dmy-AS(+) XX ♀ embryo at 10 dah*                            | 47           | 48            |
| Dmy-AS(-) XX ♂ embryo at 10dah*                             | 0            | 1             |
| Dmy-AS(+) XX ♂ embryo at 10dah*                             | 0            | 0             |
| Dmy-AS(-) XY ♀ embryo at 10 dah*                            | <b>0</b>     | <b>0</b>      |
| Dmy-AS(+) XY ♀ embryo at 10 dah*                            | <b>32</b>    | <b>28</b>     |
| Dmy-AS(-) XY ♂ embryo at 10 dah*                            | 38           | 36            |
| Dmy-AS(+) XY ♂ embryo at 10 dah*                            | 19           | 14            |

324  
 325  
 326

The sex reversals are indicated in bold. ‘\*’ Genotyping, integration specific PCR and histology of individual embryo was carried out to determine the gonadal sex.

327  
328

**Supplementary table 5: Egg production characteristics of *Dmy* knockdown fish.**

| Groups                             | Age<br>(month) | Progeny status |                    |                    |                    |
|------------------------------------|----------------|----------------|--------------------|--------------------|--------------------|
|                                    |                | F <sub>2</sub> | F <sub>3</sub>     | F <sub>4</sub>     | F <sub>5</sub>     |
| <b>Control</b>                     | 4              | 125.7±5.0      | 134.0±5.3          | 121.3±5.4          | 139.0±4.2          |
|                                    | 5              | 289.0±4.7      | 274.0±6.2          | 274.0±5.9          | 260.0±4.2          |
|                                    | 6              | 331.0±4.0      | 347.3±4.7          | 340.7±4.3          | 355.0±6.7          |
|                                    | 7              | 374.0±14.8     | 369.7±2.2          | 336.0±5.9          | 362.3±3.9          |
|                                    | 8              | 359.7±8.5      | 334.0±4.4          | 389.0±4.5          | 328.7±3.3          |
|                                    | <b>Total</b>   |                | <b>1479.3±22.2</b> | <b>1459.0±20.0</b> | <b>1461.0±22.5</b> |
| <b>DMY- KD</b>                     | 4              | 119.7±4.8      | 115.7±4.8          | 125.7±4.5          | 119.7±1.9          |
|                                    | 5              | 235.0±4.5      | 254.3±6.0          | 223.3±6.6          | 230.7±6.6          |
|                                    | 6              | 321.0±4.0      | 364.7±4.5          | 364.0±5.5          | 341.0±3.5          |
|                                    | 7              | 365.0±13.5     | 359.0±5.7          | 378.0±19.8         | 385.7±2.9          |
|                                    | 8              | 386.3±6.0      | 341.3±5.0          | 318.0±5.3          | 354.0±10.1         |
|                                    | <b>Total</b>   |                | <b>1427.0±6.0</b>  | <b>1435.0±14.6</b> | <b>1409.0±16.3</b> |
| <b>Significanc<br/>(p&lt;0.05)</b> | <b>NS</b>      | <b>NS</b>      | <b>NS</b>          | <b>NS</b>          | <b>NS</b>          |

329



**Supplementary table 6: List of major primers used in this study.**

| Primer name      | Sequence                                | Purpose                                                                        |
|------------------|-----------------------------------------|--------------------------------------------------------------------------------|
| Dmy 24 F         | TCCTATTATGGAAACCTGCACAACCTAC            | <i>Dmy</i> real-time PCR                                                       |
| DMY 26R          | GAAGGAGTGCATGCGGTACTG                   | <i>Dmy</i> and <i>Dmrt1</i> real-time PCR                                      |
| Dmrt1 25 F       | TCCTCCTACTATGGAAACCTGTACCA              | <i>Dmrt1</i> real-time PCR                                                     |
| Gsdf realtime F  | GGGCTGGACACTATTCGAGA                    | Measuring Gene expression by real-time PCR                                     |
| Gsdf realtime R  | CATGACACAGAGGAGCTGGA                    |                                                                                |
| Sf1 realtime F   | AGCTGCTACTCTGGAAACGA                    |                                                                                |
| Sf1 realtime R   | ACTGGCAATCTTCTTGGCAGC                   |                                                                                |
| GFP realtime F   | CGACAACCACTACCTGAGCA                    |                                                                                |
| GFP realtime R   | GAACTCCAGCAGGACCATGT                    |                                                                                |
| Olvas realtime F | CCCAAAGTGACCTACATC                      |                                                                                |
| Olvas realtime R | AAGTTGATGCCATCTTG                       |                                                                                |
| Foxl2 realtime F | AAACCTGCTACTCTGGACGC                    |                                                                                |
| Foxl2 realtime R | AGTCAAATCTTCTTGATTC                     |                                                                                |
| Fig1a realtime F | TGTACTGCTGCATCGAGAAGTA                  |                                                                                |
| Fig1a realtime R | ATGCTGCAACACCAGTCTAGT                   |                                                                                |
| Spo11 realtime F | TCGATTCTGGTGCCGTCTTCT                   |                                                                                |
| Spo11 realtime R | ATGCTGAAGGTTTCTCGCAGG                   |                                                                                |
| Rspo1 realtime F | TGCAACACCAGTCTAATG                      |                                                                                |
| Rspo1 realtime R | TTCTGGTGCCGTCTTCTAGG                    |                                                                                |
| Cyp19a1 RT F     | AGCTTATTTTTGCCCAAGGCC                   |                                                                                |
| Cyp19a1RT R      | TTGAGCAGCAGGAGCATGAAA                   |                                                                                |
| Gsdf ORF F       | ATGTCTTTGGCACTCATT                      | ORF amplification, <i>in situ</i> probe preparation, synthetic RNA preparation |
| Gsdf ORF R       | CTACTTTTTGCAGGGCTGCT                    |                                                                                |
| Sf1 ORF F        | AGCAAGGGTGTGAGGAG                       |                                                                                |
| Sf1 ORF R        | TTTTTGCAGGGCTGCT                        |                                                                                |
| Dmy ORF F        | CCGCGGGAGCTCATGAGCAAGGAGAAGCA           | ORF amplification, <i>in situ</i> probe preparation                            |
| Dmy ORF R        | GTGC<br>GGATCCGAATTCTGGAGTTGGCCGGAAGACG |                                                                                |
| Spo11 F          | GATGCAAGGAGAGAGTT                       | <i>In situ</i> probe preparation                                               |
| Spo11 R          | ATACTCAGCTGTTTGGGTCACA                  |                                                                                |
| Foxl2 F          | TGCACCTGACACCAGTCT                      |                                                                                |
| Foxl2 R          | TAGACAACACCGAGTCTG                      |                                                                                |
| Olvas F          | AAGAGCTCCCAGCAAGGC                      |                                                                                |
| Olvas R          | TCGGAGCTCATGAGCAAGG                     |                                                                                |
| Rspo1 F          | TGCAACACCAGTCTAATG                      |                                                                                |
| Rspo1 R          | TAGACTGCCCGTCATG                        |                                                                                |
| Fig1 $\alpha$ F  | ATGAAGGTGCCAGAGGCGGAAT                  |                                                                                |
| Fig1 $\alpha$ R  | TTAATCCCTCGAAGCTTGATCG                  |                                                                                |
| Dmy-as-Xba1 F1   | TCTAGAGGAAACCTGTACAACCTACCA             | Amplification of <i>Dmy</i> antisense region, integration check                |
| Dmy-as-Eco RV R1 | GATATCCATGGGTGGAGGTGAGGCT               |                                                                                |
| M13 F            | GATATCCGAGCATCTCCAGTAGGAGG              |                                                                                |
| M13 R            | TCTAGATCTACAGCATGAAGTGCAA               | Colony PCR,                                                                    |

|                  |                                                            |                                                            |
|------------------|------------------------------------------------------------|------------------------------------------------------------|
| T7               | GATATCGACCCTCCATACTGAAGGA                                  | Sequencing, <i>in situ</i><br>probe preparation            |
| T3               | TCTAGACTCTTTGTTCTGGCAAAGCC                                 | Sequencing, insert<br>check                                |
| Sp6              | GATATCGGTTGCAGGGCAGATGTAGT                                 |                                                            |
| Bgh R            | TCTAGAATGGGAACCACTTTGGACTC                                 |                                                            |
| pcDNA 3.1 807 F  | GATATCAGCTGAAGATGGTTGGGTTG                                 |                                                            |
| PCDNA 3.1 1127 R | ATGAAGGTGCCAGAGGCGGAAT                                     |                                                            |
| Dmy genomic F    | TTAATCCCTCGAAGCTTGATCG                                     | Genomic PCR for<br>sorting of sex                          |
| Dmy genomic R    | TCTAGAAGGAGGAGCTTGGGATTTGT                                 |                                                            |
| EF1 $\alpha$ F   | GATATCCGTCCCTCCACAGAGAAGAG                                 | Internal control for<br>Real Time PCR                      |
| EF1 $\alpha$ R   | TCTAGACTCTTCTCTGTGGAGGGACG                                 |                                                            |
| Dmy5utrF         | TCTTTTTGCAGGATCGAAAGACTGTTCTCCG<br>GTAAATTGACG             |                                                            |
| DmyORFR          | CTCACCATTTTGGTTTCACTGCTCATGGAGT<br>TGG                     | Construction of<br><i>Dmy</i><br>overexpressing<br>plasmid |
| EGFP-F           | AACCAAAATGGTGAGCAAGGGCGAG                                  |                                                            |
| EGFP-R           | GCTTTTCCTTACTTGTACAGCTCGTCCATGC<br>C                       |                                                            |
| Dmy3utrF         | CAAGTAAGGAAAAGCTGCGAGGC                                    | Real-time analysis<br>of ChIP DNA                          |
| Dmy3utrR         | CGAATCGATGGGATCGACCATCTCATTTTTT<br>ATTCTTGATTTTCACTTTCATCT |                                                            |
| Gsdf geno-F1     | CTGCCGGATCATTCTCCTTG                                       |                                                            |
| Gsdf-geno-R1     | GGGCTGGGAACCTGAGT                                          |                                                            |
| Sox9a2geno-F1    | GCGCACGAGGTTTTATTGAGT                                      |                                                            |
| Sox9a2geno-R1    | TCTCTTTCCAGGCTCCTTAATG                                     |                                                            |
| Rsp1 geno-F1     | ATGGTGTGCAGTCTGGTTTAAT                                     |                                                            |
| Rsp1 geno-R1     | ATAAACTTTGCAATCATAACTGTT                                   |                                                            |

332  
333  
334  
335

336 **Supplementary figures:**

337

338 **Supplementary figure 1. Construction of *Dmy* knockdown plasmid and *in silico***

339 **analysis of efficacy.** The *Dmy*-knockdown plasmid was constructed on a pcDNA3.1 (+)

340 vector backbone (A). The AS fragment/probe, predicted to have the best secondary AS

341 RNA structure (B), was inserted in a reverse orientation into the pcDNA 3.1(+) vector to

342 generate the knockdown plasmid.

343

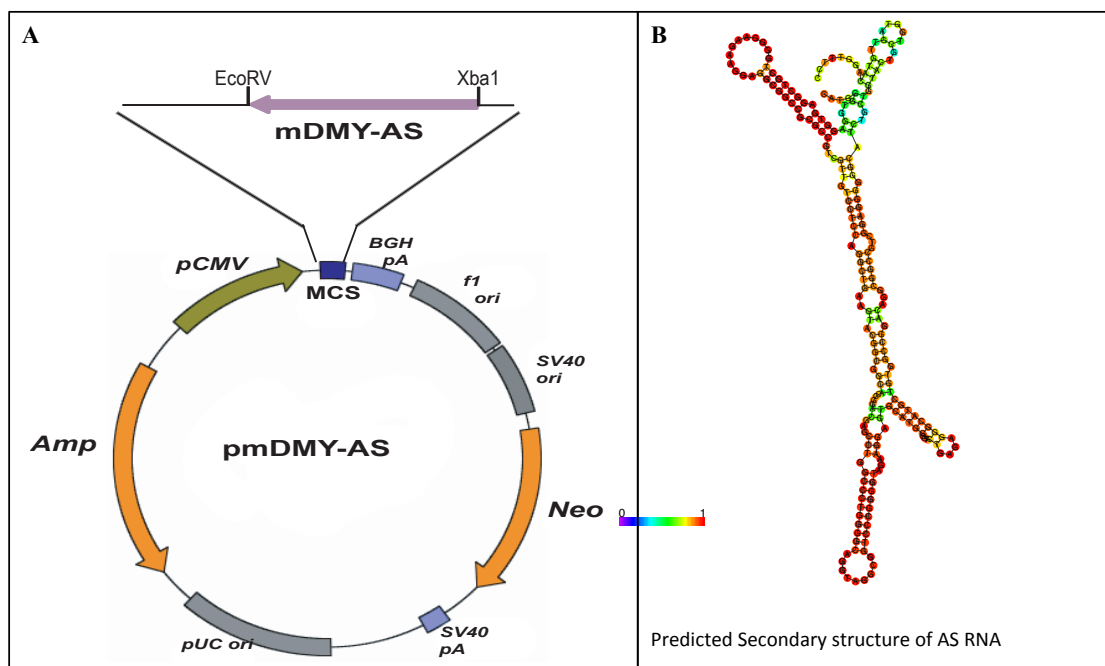

344  
345

346 **Supplementary figure 2. Possible mechanism of vector based AS DNA dependent**  
 347 **AS RNA machinery *in vivo*.** Northern blotting was used to identify the *Dmy* specific  
 348 RNA degradation (A). Lane 1, 2, 3, 4, 5 in northern blot represents small RNAs from  
 349 adults of *Dmy-KD* F<sub>1</sub> XX, *Dmy-KD* F<sub>1</sub> XY, wild QurtE medaka XX, wild QurtE medaka  
 350 XY and negative control (only RNA loading buffer), respectively (A). The maximally  
 351 expressed lower molecular weight RNAs, marked in the chemo-luminescent graph as per  
 352 their sizes i.e. 60 -70 mer and 18-28 mer, were used for further isolation and small-RNA  
 353 library construction. The original *Dmy* AS sequence (B<sub>1</sub>) was used as a reference to find  
 354 out the *Dmy* specific small AS RNAs in the small-RNA libraries constructed using 60-70  
 355 (total clones= 4261) and 18-28 (total clones = 6176) mer purified RNAs. Chromatograms  
 356 of two different 70 mer (out of total 4261 clones) and three different 18-28 mer (out of  
 357 total 6176 clones) are presented in B<sub>2</sub> and B<sub>3</sub>, respectively. The pink boxes in B<sub>2</sub> panel  
 358 represents the sequences of 18-28 mer RNAs obtained from the 18-28 mer library. (C)  
 359 Schematic representation of hypothetical pathway of knockdown *in vivo*.  
 360

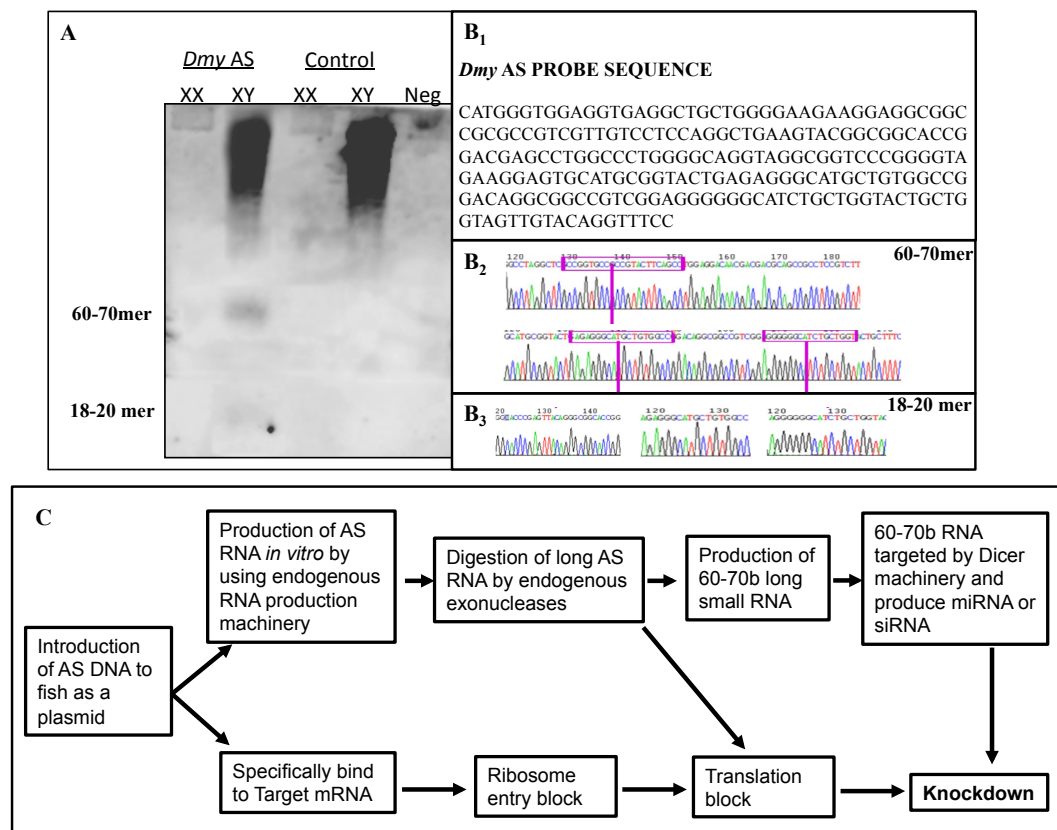

361

362 **Supplementary figure 3. Effect of *Dmy* knockdown on gonadal gene profile in**  
 363 **adults.** Data are presented as both individual values (with dots and triangles) and mean of  
 364 15 XY individuals (white and grey columns for control and knockdown groups,  
 365 respectively). Inset: representative figure for genotyping of the fish used for real-time  
 366 PCR, where the upper and lower band represents *Dmrt1a* and *Dmy* specific amplification,  
 367 respectively; M-marker.

368

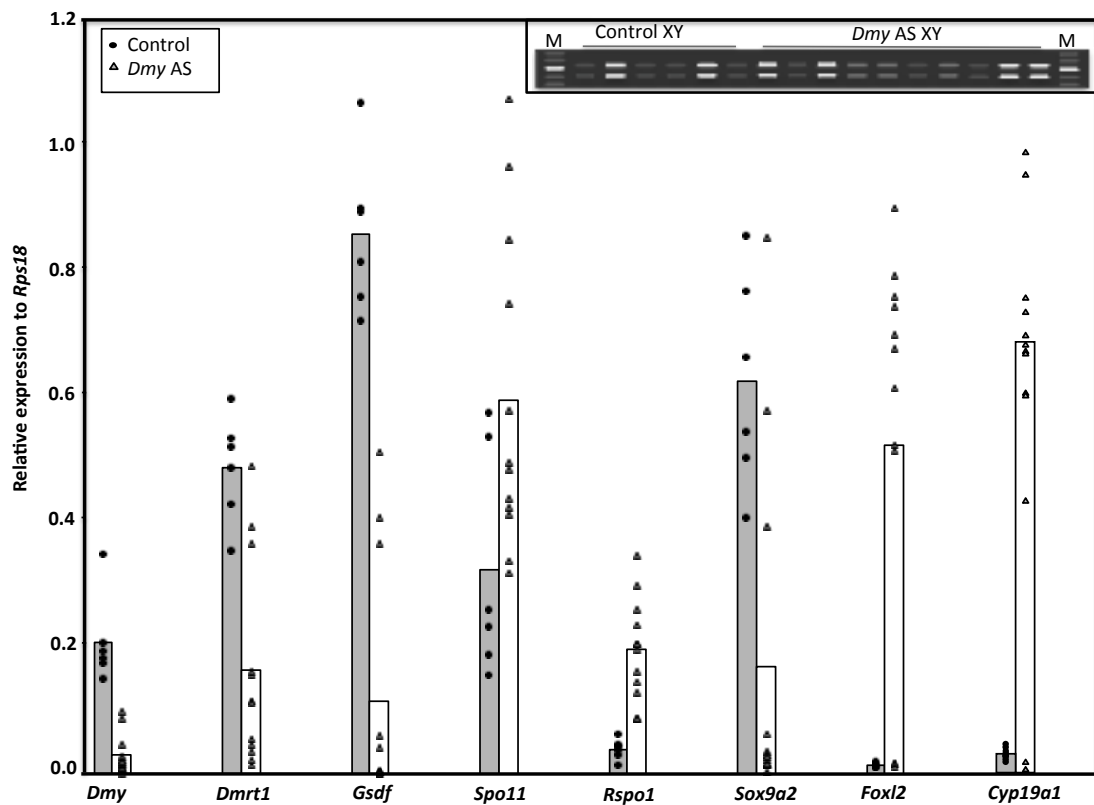

369  
370

371 **Supplementary figure 4. *In vivo* evaluation of knockdown efficiency of F2**  
 372 **transgenics.** The distribution of antisense RNA in different tissues were assessed by AS-  
 373 RNA specific primers to evaluate the germ line transmission in Dmy-KD (Dmy-AS(+)) 5  
 374 month adults (A). The same samples were further checked for *Dmy* transcription,  
 375 compared with control XY and plotted in graphs as relative abundance to internal control  
 376 (B). 20, 50 and 90 dah Dmy-AS(+) XY individuals were evaluated for *Dmy* (C) and  
 377 *Dmrt1* (D) transcriptional silencing. Note: Each column in the graph represents mean  $\pm$   
 378 SEM of 10 individuals and letters (a, b, c, etc.) above the bars indicate that these groups  
 379 differ significantly ( $p < 0.05$ ) from each other.

380

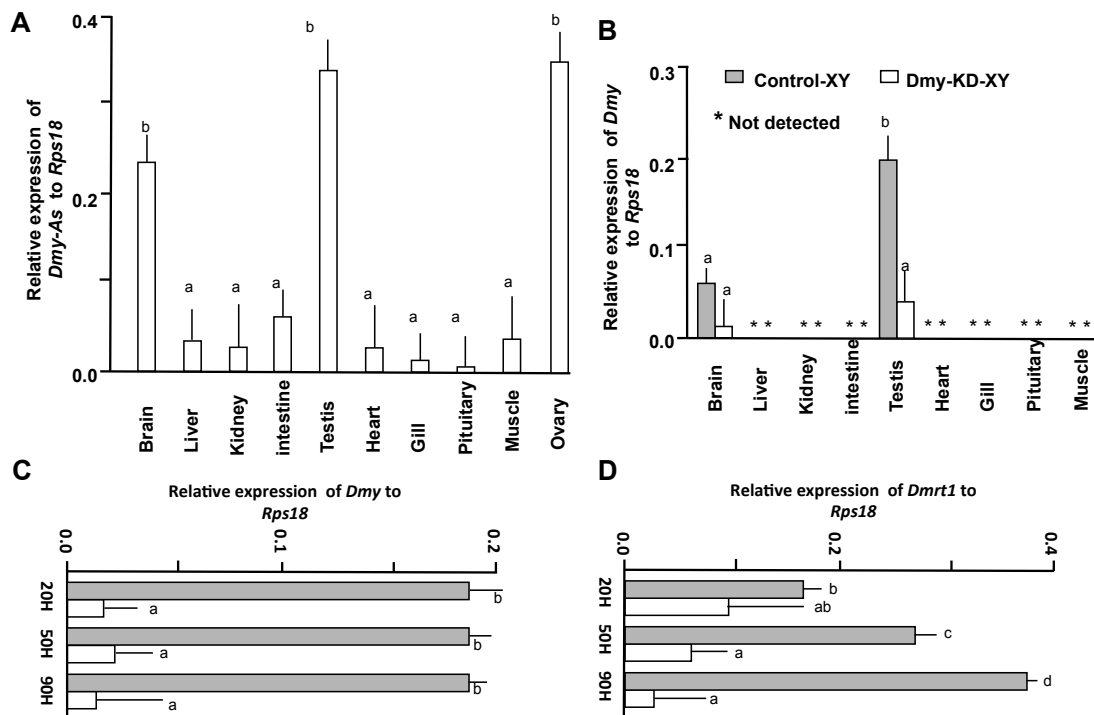

381  
382

383 **Supplementary figure 5. *In vivo* chromatin immunoprecipitation analysis of**  
384 **candidate *Dmy* targets.** Relative expression to control input was calculated using  
385 realtime PCR and plotted on the graph. Data are presented as means  $\pm$  SEM of 4 separate  
386 experiments and significances ( $p < 0.05$ ) are denoted by different letters.  
387

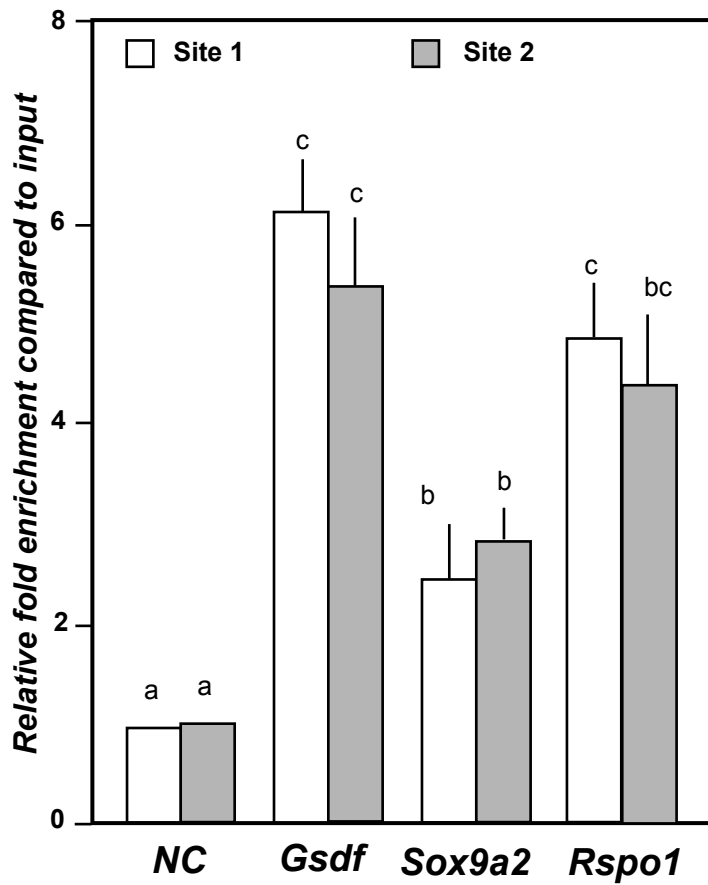

388

389 **Supplementary figure 6. Effect of *Gsdf* and *Sox9a2* overexpression on germ cell**  
390 **proliferation and reversal of *Dmy*-KD phenotype.** Germ cell (green colour)  
391 proliferation and clustering patterns of *olvas-eGFP* transgenic medaka (both control and  
392 *Dmy*-KD) gonads at S39 (1 day before hatching) were assessed using confocal  
393 microscope. Isolated (type-I) and clustered (type- II) germ cells are marked with \* and #,  
394 respectively. (A-D) *Olvas-eGFP*-control-XX and (E-H) *olvas-eGFP-Dmy*-KD-XY  
395 embryos. Note: N= 9 per group and control RNAs were prepared by mcherry/cyan fusion  
396 with *Gsdf* or *Sox9a2* 3' UTR.

397

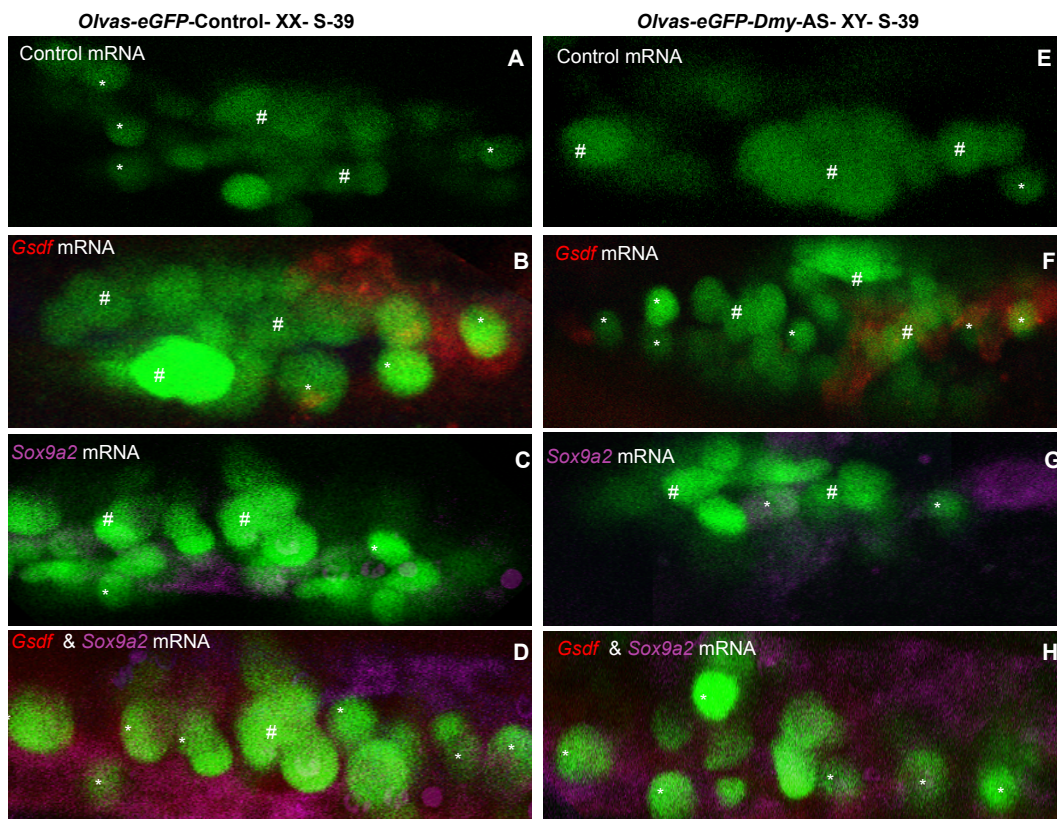

398



399 **Supplementary figure 7. Schematics of breeding and mating strategies of Dmy-KD**  
400 **transgenic line.** The adult individuals were analysed for genome integration and genetic  
401 sex before mating in each generation.

402

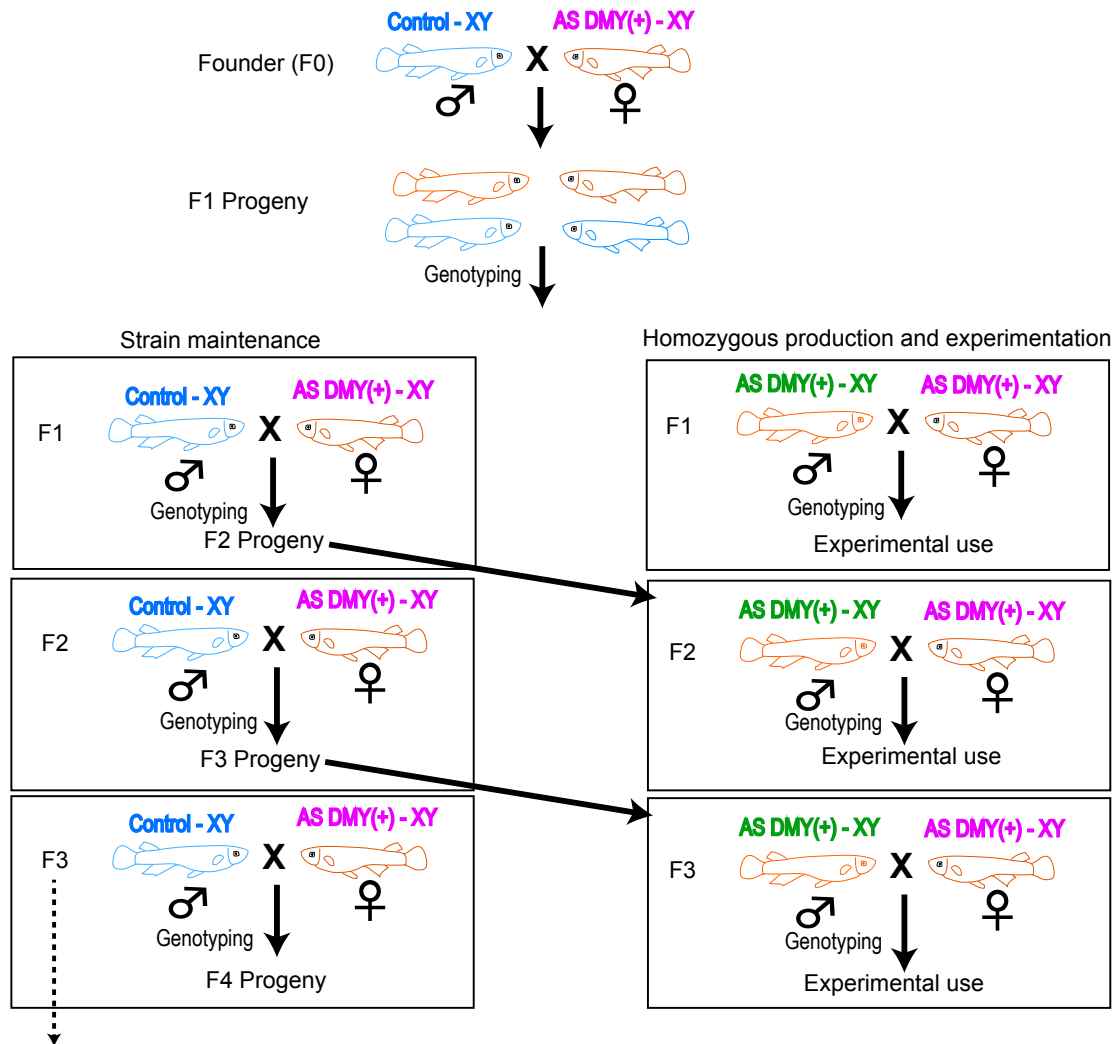

Supplement: srep19480-s1.pdf [file srep19480-s1.pdf]
